# Supplementary material for: A comparison of the effects of resistant starch types on glycemic response in individuals with type 2 diabetes or prediabetes: A systematic review and meta-analysis
Source: Front Nutr. 2023 Mar 27;10:1118229. doi: 10.3389/fnut.2023.1118229 (PMC10085630; doi:10.3389/fnut.2023.1118229)
Supplement: Supplementary file 4 [file Table_3.xlsx]

## Sheet: Sheet1
Supplemental table 3. Study characteristics
Study	Duration	N (M/F)	Population	Age Mean ± SD	BMI Mean ± SD	Intervention	RS (g)	Control	CHO (g)	Available CHO matched?	Outcomes of interest
Acute
Tucker 2014	300 min	11/1	T2D	63.8 ± 11.4	32 ± 4.8	whole-grain sourdough bread	NR	white sourdough bread	50	Yes	PBG, PI
Behall 2005	180 min	6/6	IR	46 ± 10.5	25.6 ± 3.3	RS 2 crisps	11.9	high-amylopectin crisps	70	Yes	PBG, PI
Behall 2005	180 min	6/6	IR	46 ± 10.5	25.6 ± 3.3	RS 2 muffins	24.7	high-amylopectin muffins	70	yes	PBG, PI
Canfora 2022	240 min	12/0	pre-d	59 ± 7	29.2 ± 2.8	inulin-RS 2	7.5	inulin-maltodextrin	NR	NR	PBG, PI
Giacco 1998	480 min	6/4	T2D	50 ± 6.3	27 ± 2.8	RS 2 cheesecake	16	high-amylopectin starch cheesecake	116	No	PBG, PI
Hartvigsen 2014	270 min	7/8	MetS	62.8 ± 4.2	31.1 ± 3.2	intact kernel rye bread	NR	wheat bread	50	NR	PBG, PI, GLP-1, GIP
Jarvi 1995	360 min	2/8	T2D	61 ± 9.0	27.0 ± 2.9	low GI meal	NR	high GI meal	84.05 ± 0.45*	NR	PBG, PI
Study 2
Krezowski 1987	300 min	9/0	T2D	63 ± 6	NR	RS 2 muffins	18*	Low amylose maize starch muffins	50	NR	PBG, PI
(Study 2)
Larsen 2000	180 min	6/3	T2D	60 ± 6	26 ± 3.9	pressure parboiled rice with RS 3	1*	traditionally parboiled + non-parboiled rice	50	Yes	PBG, PI
MacNeil 2013	300 min	5/7	T2D	60 ± 4.8	33 ± 4.5	RS 2 bagel	25.1 ± 5.8	Wheat Bagel	64.6 ± 13.4	Yes	PBG, PI, GLP-1, GIP
Mete 2021	180 min	8 (ratio unknown)	glucose intolerant	NR	NR	coarse stoneground flour	NR	Fine roller-milled flour	34.5 ± 0.5*	Yes	PBG, PI
Panlasigui 2006	60 min	5/4	T2D	55.9 ± 10.2	NR	brown rice	NR	milled rice	87.65 ± 0.45*	Yes	PBG
Reader 2002	300 min	7/3	T2D	NR	NR	RS 2 energy bar	7.25	Traditional energy bar	50	NR	PBG, PI
Reynolds 2020	180 min	10/5	T2D	64 ± 10	32 ± 7	Roller-milled wholegrain flour (40%), intact whole grains (30%), kibbled whole grains (30%)	NR	roller-milled, wholegrain flour	50	Yes	PBG
Yamada 2005	120 min	9/11	IR	50.5 ± 7.5	NR	bread with RS 3	6	bread without retrograded starch	65.2 ± 0.25	NR	PBG, PI
Chronic
Ble-Castillo 2010	28 days	4/24	T2D	51.7 ± 5.6	34.89 ± 2.32	RS 2	8.2	soy milk powder	NR	NR	FBG, FI, HOMA-IR, HbA1c
Bodinham 2012	28 days	8/4	IR	37 ± 13.9	28.2 ± 1.4	60% RS 2	40	Amioca (RDS)	NR	NR	FBG, PBG, FI
						40% RDS
Bodinham 2014	84 days	12/5	T2D	55 ± 9.9	30.6 ± 1.3	60% RS 2	40	Amioca (RDS)	NR	Yes	FBG, FI, PBG, PI, HOMA-%S, HOMA-%B, HbA1c
						40% RDS
Dainty 2016	57 days	16/8	IR	55.3 ± 1.59	30.2±0.6	RS 2 Bagel	25	Wheat bagel	60.9 ± 3.0	NR	FBG, FI, HOMA-IR, PBG, PI
Dodevska 2016	365 days	I: 10/15 C: 9/16	Pre-d	I: 58.36 ± 6.12 C: 56.96 ± 6.13	I: 33.06 ± 5.59 C: 31.07 ± 5.03	RS diet	14	fibre diet	270.2 ± 84.1	Yes	FBG, FI, HOMA-IR
Eshghi 2019	84 days	8/13	Pre-d	35 ± 7	32 ± 3.5	RS 2	8.1	Maltodextrin	NR	NR	FBG, FI, HOMA-IR
Gower 2016	28 days	0/14	IR	48.3 ± 12.6	29.8 ± 6.7	RS 2 cookies	15 & 30	Waxy corn starch cookies	39 ± 1.93	NR	FBG, FI, insulin sensitivity
Jarvi 1999	24 days	15/5	T2D	66.5 ± 6.3	25.3 ± 2.7	low GI food menu	NR	high GI food menu	247 ± 8*	NR	FBG, FI, PBG, PI, HbA1c
Johnston 2010	84 days	I: 6/4	IR	I: 45.2 ± 11.1	I: 31.3 ± 11.2	RS 2	40	27g Amioca	NR	NR	HOMA-%S, HOMA-%B
		C: 6/4		C: 50.1 ± 12.8	C: 30.4 ± 3.6
Karimi 2015	56 days	I: 0/28	T2D	I: 49.5 ± 8.0	I: 31.5 ± 4.5	RS 2	10	Maltodextrin	Yes	Yes	FBG, FI, HbA1c, HOMA-IR
		C: 0/28		C: 48.6 ± 7.9	C: 31.0 ± 4.9
Kwak 2012	28 days	47/38	Pre-d/T2D	I: 51.7 ± 12.9	I: 25.0 ± 3.1	High RS 2 rice (corn starch)	6.51	Refined rice	NR	Yes	FBG, FI, HOMA-IR
				C: 49.4 ± 1.5	C: 24.5 ± 2.5
Lin 2015	2 days	22/22	T2D	52.1 ± 10.5	26.1 ± 4	RS 2 (20%) and 3 (10%) rice/noodles	6*	commerically-available rice/noodles	NR	Yes	PBG
Lobley 2013	21 days	14/0	MetS	NR	NR	RS-enriched diet	25	NSP-enriched diet	NR	NR	FBG, FI, HOMA-IR, PBG, PI
Malin 2019	56 days	3/10	IR	37.2 ± 6.5	33.6 ± 5.0	whole-grain diet	NR	refined-grain diet	NR	NR	FBG, FI, PBG, PI
Meng 2015	84 days	I: 19/15 (A)	T2D	I (group A): 52.5 ± 8.3	I (group A): 25.21 ± 3.51	A:RS fortified stream bun; (7.23% RS)	30	Ordinary steamed bun (2.21% RS)	NR	NR	FBG, FI
		16/18 (B)		I (group B): 51.4 ± 7.8	I (group B): 25.44 ± 3.85	B: Herbal Steamed bun (4.03%RS)
		C: 12/21		C: 53.2±6.9	C: 25.10 ± 4.15
Nichenametla 2014	84 days	13/14	MetS	55.7 ± 13.0	93.4 ± 14.3	RS 4 flour	24	wheat flour	NR	Yes	FBG, HbA1c
Peterson 2018	84 days	I: 15/14 C: 5/25	pre-d	I:54 ± 10 C:55 ± 10	I: 35.5 ± 4.4 C: 35.7 ± 5.2	RS 2	45	Amioca	NR	N	FBG, FI, PBG, PI, HbA1c
Robertson 2012	56 days	8/7	IR	48.9 ± 15.1	33.8 ± 7.6	RS 2	40	Amioca	NR	Yes	FBG, FI, HOMA-%B HOMA-IR
Sandberg 2018	3 days	30/8	pre-d	63.6 ± 5.3	24.6 ± 2.7	rye bread with RS 2	14.3	white bread, rye bread	50	Yes	FBG, FI, PBG, PI, HOMA-IR, GLP-1
Wang 2017	84 days	I: 22/19 C: 20/20	T2D	I: 60.52 ± 9.81	I: 26.38 ± 7.93	High RS rice (10% RS 2)	20-35	Ordinary Rice (0.1% RS)	NR	NR	FBG, PBG, FI
				C:60.37 ± 7.00	C: 23.35 ± 6.11
Zhang 2007	28 days	17/23	T2D	51.7 ± 9.5	27 ± 2.4	HMS (RS 2)	30	wheat	NR	NR	FBG, FI
C, control, FBG, fasting blood glucose, FI, fasting insulin, GIP, Gastric inhibitory polypeptide, GLP-1, glucagon-like peptide 1, RS 2, resistant starch type 2, HbA1c, glycated haemoglobin, HOMA-%B, Homeostatic model assessment of beta-cell function, HOMA-%S, Homeostatic model assessment of insulin sensitivity, HMS, high-amylose maize starch, IR, insulin resistance, I, intervention, MS, maize sta…
